# Supplementary material for: Microbiology Investigation Criteria for Reporting Objectively (MICRO): a framework for the reporting and interpretation of clinical microbiology data
Source: Springer Nature journal article supplement (doi:10.1186/s12916-019-1301-1), 2019-03-29
Supplement: MOESM1 [file 12916_2019_1301_MOESM1_ESM.pdf]

## **Supplementary Material**

### **Microbiology Investigation Criteria for Reporting Objectively (MICRO): a framework for the reporting and interpretation of clinical microbiology data**

Paul Turner, Andrew Fox-Lewis, Poojan Shrestha, David A.B. Dance, Tri Wangrangsimakul, Tomas-Paul Cusack, Clare L. Ling, Jill Hopkins, Tamalee Roberts, Direk Limmathurotsakul, Ben S. Cooper, Susanna Dunachie, Catrin E. Moore, Christiane Dolecek, H. Rogier van Doorn, Philippe J. Guerin, Nicholas P.J. Day  
Elizabeth A. Ashley

## Details of microbiology datasets from South and South East Asia included in the review

For each study, the antimicrobial susceptibility guideline details are summarised along with deviations from expected reporting for four bug-drug combinations: *Klebsiella pneumoniae* – ampicillin; *Salmonella* sp. – gentamicin; *Staphylococcus aureus* – beta-lactams; *Streptococcus pneumoniae* – penicillin. The *Staphylococcus aureus* – beta-lactams combination includes any penicillin, cephalosporin, or carbapenem apart from penicillinase-labile drugs (benzylpenicillin, phenoxymethylpenicillin, amoxicillin, ampicillin).

AST: antimicrobial susceptibility testing; BSAC: British Society for Antimicrobial Chemotherapy; CLSI (NCCLS): Clinical and Laboratory Standards Institute (National Committee for Clinical Laboratory Standards); EUCAST: European Committee on Antimicrobial Susceptibility Testing; NICD: National Institute for Communicable Diseases; WHO: World Health Organization.

| First author   | Manuscript title                                                                                                                                                                  | Publication year | Stated AST guideline | Guideline version | Target organism              | Target antimicrobial | Problem identified                        | Ref. |
|----------------|-----------------------------------------------------------------------------------------------------------------------------------------------------------------------------------|------------------|----------------------|-------------------|------------------------------|----------------------|-------------------------------------------|------|
| Abdullah FE    | Enteric fever in Karachi: current antibiotic susceptibility of <i>Salmonellae</i> isolates                                                                                        | 2012             | Not stated           |                   |                              |                      |                                           | (1)  |
| Achana V       | Acute <i>Pseudomonas pseudomallei</i> pneumonia and septicemia following aspiration of contaminated water: a case report                                                          | 1985             |                      |                   |                              |                      |                                           | (2)  |
| Acharya D      | Antibiotic susceptibility pattern and the indicator of decreased ciprofloxacin susceptibility of <i>Salmonella enterica</i> serovar Typhi isolated from Dhulikhel Hospital, Nepal | 2012             | Not stated           |                   |                              |                      |                                           | (3)  |
| Agnihotri N    | Antimicrobial susceptibility of isolates from neonatal septicemia                                                                                                                 | 2004             | CLSI (NCCLS)         | 2000              | <i>Staphylococcus aureus</i> | Beta-lactams         | Does not report oxacillin / ceftioxin     | (4)  |
| Al-Taiar A     | Neonatal infections in China, Malaysia, Hong Kong and Thailand                                                                                                                    | 2013             | Not stated           |                   |                              |                      |                                           | (5)  |
| Amatya NM      | Etiological agents of bacteraemia and antibiotic susceptibility pattern in Kathmandu Model Hospital                                                                               | 2007             | CLSI (NCCLS)         | Not stated        |                              |                      |                                           | (6)  |
| Anand AC       | The anatomy of an epidemic (the final report on an epidemic of multidrug resistant enteric fever in eastern India)                                                                | 1993             |                      |                   | <i>Salmonellae</i>           | Gentamicin           | Reports result (and susceptible isolates) | (7)  |
| Anderson M     | Epidemiology of bacteremia in young hospitalized infants in Vientiane, Laos, 2000-2011                                                                                            | 2014             | CLSI (NCCLS)         | 2010              | <i>Klebsiella pneumoniae</i> | Ampicillin           | None                                      | (8)  |
|                |                                                                                                                                                                                   |                  |                      |                   | <i>Staphylococcus aureus</i> | Beta-lactams         | None                                      |      |
| Anekthananon T | Community-acquired <i>Klebsiella</i> bacteremia                                                                                                                                   | 2001             | Not stated           |                   |                              |                      |                                           | (9)  |
| Anjum P        | Fluoroquinolone resistance in typhoidal <i>Salmonella</i> and its detection by nalidixic acid disc diffusion                                                                      | 2004             | CLSI (NCCLS)         | Not stated        |                              |                      |                                           | (10) |

| First author   | Manuscript title                                                                                                      | Publication year | Stated AST guideline                 | Guideline version | Target organism                 | Target antimicrobial    | Problem identified                                             | Ref. |
|----------------|-----------------------------------------------------------------------------------------------------------------------|------------------|--------------------------------------|-------------------|---------------------------------|-------------------------|----------------------------------------------------------------|------|
| Anthony B      | Spectrum of melioidosis in the suburbs of Mangalore, S west coast of India                                            | 2010             | CLSI (NCCLS)                         | 2005              |                                 |                         |                                                                | (11) |
| Anunnatsiri S  | Febrile neutropenia: a retrospective study in Srinagarind Hospital                                                    | 1998             | Not stated                           |                   | <i>Staphylococcus aureus</i>    | Beta-lactams            | None                                                           | (12) |
| Arafat MY      | Current Pattern in Antimicrobial Susceptibility in Enteric Fever In A Private Medical College                         | 2014             |                                      |                   | <i>Salmonellae</i>              | Gentamicin              | Reports result (and susceptible isolates)                      | (13) |
| Arifeen SE     | Invasive pneumococcal disease among children in rural Bangladesh: results from a population-based surveillance        | 2009             |                                      |                   | <i>Streptococcus pneumoniae</i> | Penicillin              | None                                                           | (14) |
| Ariffin H      | Septicaemia in paediatric cancer patients: a 5-year surveillance study in university hospital, Kuala Lumpur, Malaysia | 1997             | Not stated                           |                   | <i>Staphylococcus aureus</i>    | Beta-lactams            | Reports methicillin but not oxacillin / cefoxitin              | (15) |
| Arora RK       | Multidrug resistant typhoid fever: study of an outbreak in Calcutta                                                   | 1992             |                                      |                   | <i>Salmonellae</i>              | Gentamicin              | Reports result (and susceptible isolates)                      | (16) |
| Arora S        | Changing susceptibility patterns of nonfermenting Gram-negative bacilli                                               | 2012             | CLSI (NCCLS)                         | 2010              |                                 |                         |                                                                | (17) |
| Aurangzeb B    | Neonatal sepsis in hospital-born babies: bacterial isolates and antibiotic susceptibility patterns                    | 2003             |                                      |                   |                                 |                         |                                                                | (18) |
| Ayyagari A     | Outbreak of typhoid fever due to multiresistant <i>Salmonella typhi</i> in northern India - a preliminary report      | 1991             |                                      |                   |                                 |                         |                                                                | (19) |
| Bajracharya BL | Clinical profile and antibiotics response in typhoid fever                                                            | 2006             |                                      |                   |                                 |                         |                                                                | (20) |
| Baker S        | Fatal wound infection caused by <i>Chromobacterium violaceum</i> in Ho Chi Minh City, Vietnam                         | 2008             | CLSI (NCCLS)                         | 2007              |                                 |                         |                                                                | (21) |
| Banerjee M     | Outbreak of neonatal septicemia with multidrug resistant <i>Klebsiella pneumoniae</i>                                 | 1993             |                                      |                   | <i>Klebsiella pneumoniae</i>    | Ampicillin              | None                                                           | (22) |
| Bankar S       | Study of ascitic fluid for diagnosis of spontaneous bacterial peritonitis (SBP) in adult patients with cirrhosis      | 2014             | CLSI (NCCLS)                         | 2013              | <i>Staphylococcus aureus</i>    | Beta-lactams            | None                                                           | (23) |
| Baskaran ND    | Bacteremia in patients with febrile neutropenia after chemotherapy at a university medical center in Malaysia         | 2007             | CLSI (NCCLS)                         | 2004              | <i>Staphylococcus aureus</i>    | Beta-lactams            | Reports methicillin but not oxacillin / cefoxitin              | (24) |
| Behera B       | Ceftazidime resistance in <i>Burkholderia pseudomallei</i> : first report from India                                  | 2012             | Not stated (but states MIC cut-offs) |                   |                                 |                         |                                                                | (25) |
| Bhagawati G    | Study on isolates of acute meningitis in a tertiary care centre in Assam                                              | 2014             | CLSI (NCCLS)                         | 2010              | <i>Staphylococcus aureus</i>    | Beta-lactams            | Does not report oxacillin / cefoxitin                          | (26) |
|                |                                                                                                                       |                  |                                      |                   | <i>Streptococcus pneumoniae</i> | Gentamicin / Penicillin | Reports isolates susceptible to gentamicin and penicillin non- |      |

| First author    | Manuscript title                                                                                                                                             | Publication year | Stated AST guideline | Guideline version | Target organism                 | Target antimicrobial | Problem identified                           | Ref. |
|-----------------|--------------------------------------------------------------------------------------------------------------------------------------------------------------|------------------|----------------------|-------------------|---------------------------------|----------------------|----------------------------------------------|------|
|                 |                                                                                                                                                              |                  |                      |                   |                                 |                      | susceptibility on basis of disk testing only |      |
| Bhagra S        | Antibiotic susceptibility pattern of <i>Salmonella enterica</i> serovar Typhi and Paratyphi A from North India: The changing scenario                        | 2014             | CLSI (NCCLS)         | 2012              |                                 |                      |                                              | (27) |
| Bhaskar MM      | Changing paradigm of enterococcal infections                                                                                                                 | 2015             | CLSI (NCCLS)         | 2013              |                                 |                      |                                              | (28) |
| Bhat KG         | Neonatal bacteremia due to high level aminoglycoside resistant (HLAR) enterococci                                                                            | 1997             | CLSI (NCCLS)         | 1990              |                                 |                      |                                              | (29) |
| Bhattacharya SS | Occurrence of <i>Salmonella typhi</i> infection in Rourkela, Orissa                                                                                          | 2000             | WHO                  | 1987              | <i>Salmonellae</i>              | Gentamicin           | Reports result (and susceptible isolates)    | (30) |
| Bhattacharya SS | Occurrence & antibiogram of <i>Salmonella</i> Typhi & <i>S. Paratyphi A</i> isolated from Rourkela, Orissa                                                   | 2011             | CLSI (NCCLS)         | 2006              | <i>Salmonellae</i>              | Gentamicin           | Reports result (and susceptible isolates)    | (31) |
| Bindu D         | Bacterial profile and antibiotic susceptibility pattern of blood culture isolates from pediatric age group attending a tertiary care centre                  | 2013             |                      |                   | <i>Staphylococcus aureus</i>    | Beta-lactams         | Does not report oxacillin / ceftioxin        | (32) |
| Boonyagars L    | Meningitis and spondylodiscitis due to <i>Streptococcus suis</i>                                                                                             | 2010             | Not stated           |                   |                                 |                      |                                              | (33) |
| Butt T          | Central venous catheter-related bloodstream infections in cancer patients                                                                                    | 2004             | CLSI (NCCLS)         | 2000              | <i>Staphylococcus aureus</i>    | Beta-lactams         | None                                         | (34) |
| Butt T          | Changing trends in drug resistance among typhoid <i>salmonellae</i> in Rawalpindi, Pakistan                                                                  | 2005             | CLSI (NCCLS)         | 2000              |                                 |                      |                                              | (35) |
| Capoor MR       | <i>Salmonella enterica</i> serovar Typhi: molecular analysis of strains with decreased susceptibility and resistant to ciprofloxacin in India from 2001-2003 | 2007             | CLSI (NCCLS)         | 2005              |                                 |                      |                                              | (36) |
| Chaikittisuk N  | <i>Salmonella</i> bacteremia in children: a changing pattern of antibiotic resistance                                                                        | 2000             | CLSI (NCCLS)         | Not stated        | <i>Salmonellae</i>              | Gentamicin           | Reports result (and susceptible isolates)    | (37) |
| Chande C        | Change in antimicrobial resistance pattern of <i>Salmonella</i> Typhi in central India                                                                       | 2002             | CLSI (NCCLS)         | 1997              | <i>Salmonellae</i>              | Gentamicin           | Reports result (and susceptible isolates)    | (38) |
| Chim H          | <i>Aeromonas</i> infection in critically ill burn patients                                                                                                   | 2007             | CLSI (NCCLS)         | Not stated        |                                 |                      |                                              | (39) |
| Chlebicki MP    | First outbreak of colonization and infection with vancomycin-resistant <i>Enterococcus faecium</i> in a tertiary care hospital in Singapore                  | 2006             |                      |                   |                                 |                      |                                              | (40) |
| Chong CY        | Invasive pneumococcal disease in Singapore children                                                                                                          | 2009             |                      |                   | <i>Streptococcus pneumoniae</i> | Penicillin           | None                                         | (41) |

| First author       | Manuscript title                                                                                                                                                       | Publication year | Stated AST guideline | Guideline version | Target organism              | Target antimicrobial | Problem identified                                           | Ref. |
|--------------------|------------------------------------------------------------------------------------------------------------------------------------------------------------------------|------------------|----------------------|-------------------|------------------------------|----------------------|--------------------------------------------------------------|------|
| Choudhary A        | Antimicrobial susceptibility of <i>Salmonella enterica</i> serovars in a tertiary care hospital in southern India                                                      | 2013             | CLSI (NCCLS)         | 2006              |                              |                      |                                                              | (42) |
| Deris ZZ           | The prevalence and risk factors of nosocomial <i>Acinetobacter</i> blood stream infections in tertiary teaching hospital in north-eastern Malaysia                     | 2009             |                      |                   |                              |                      |                                                              | (43) |
| Dhanashree B       | Antibiotic susceptibility profile of <i>Salmonella enterica</i> serovars: trend over three years showing re-emergence of chloramphenicol sensitivity and rare serovars | 2007             | CLSI (NCCLS)         | 2005              |                              |                      |                                                              | (44) |
| Duggal S           | Recent outbreak of meningococcal meningitis--a microbiological study with brief review of literature                                                                   | 2007             | CLSI (NCCLS) / NICD  | 2005              |                              |                      |                                                              | (45) |
| Duggal S           | Etiology and susceptibility of blood stream infections in a Referral Hospital in North Delhi: A one year study                                                         | 2014             | CLSI (NCCLS)         | 2007              |                              |                      |                                                              | (46) |
| Dutta S            | Rollback of <i>Salmonella enterica</i> serotype typhi resistance to chloramphenicol and other antimicrobials in Kolkata, India                                         | 2005             |                      |                   |                              |                      |                                                              | (47) |
| Easow JM           | Blood stream infections among febrile patients attending a teaching hospital in western region of Nepal                                                                | 2010             | CLSI (NCCLS)         | 2005              | <i>Salmonellae</i>           | Gentamicin           | Reports result (and susceptible isolates)                    | (48) |
|                    |                                                                                                                                                                        |                  |                      |                   | <i>Staphylococcus aureus</i> | Beta-lactams         | None                                                         |      |
| Emary K            | Enteric fever in Cambodian children is dominated by multidrug-resistant H58 <i>Salmonella enterica</i> serovar Typhi with intermediate susceptibility to ciprofloxacin | 2012             | CLSI (NCCLS)         | 2012              |                              |                      |                                                              | (49) |
| Geetha VK          | Plasmid-mediated quinolone resistance in typhoidal <i>Salmonellae</i> : a preliminary report from South India                                                          | 2014             | CLSI (NCCLS)         | 2012              |                              |                      |                                                              | (50) |
| Geethu M           | Antimicrobial susceptibility trends among viridans streptococci isolates from cases of endocarditis from 2007-2009                                                     | 2010             | CLSI (NCCLS)         | Not stated        |                              |                      |                                                              | (51) |
| Gopal Katherason S | Prospective surveillance of nosocomial device-associated bacteremia in three adult intensive units in Malaysia                                                         | 2010             | Not stated           |                   | <i>Staphylococcus aureus</i> | Beta-lactams         | Does not report oxacillin / ceftazidime; reports ceftazidime | (52) |
| Gupta P            | Clinical profile of <i>Klebsiella</i> septicemia in neonates                                                                                                           | 1993             |                      |                   |                              |                      |                                                              | (53) |

| First author    | Manuscript title                                                                                                                                         | Publication year | Stated AST guideline | Guideline version | Target organism                 | Target antimicrobial | Problem identified                                | Ref. |
|-----------------|----------------------------------------------------------------------------------------------------------------------------------------------------------|------------------|----------------------|-------------------|---------------------------------|----------------------|---------------------------------------------------|------|
| Gupta V         | An increase in enteric fever cases due to <i>Salmonella</i> Paratyphi A in & around Chandigarh                                                           | 2009             | CLSI (NCCLS)         | 2006              |                                 |                      |                                                   | (54) |
| Gyawali N       | Bacteriological profile and antibiogram of neonatal septicemia                                                                                           | 2013             | CLSI (NCCLS)         | 2006              | <i>Staphylococcus aureus</i>    | Beta-lactams         | Does not report oxacillin / cefoxitin             | (55) |
| Habib AG        | Community-acquired <i>Klebsiella pneumoniae</i> central nervous system infections in adults in Singapore                                                 | 2003             |                      |                   | <i>Klebsiella pneumoniae</i>    | Ampicillin           | None                                              | (56) |
| Halder D        | Neonatal meningitis and septicaemia caused by <i>Burkholderia pseudomallei</i>                                                                           | 1998             | Not stated           |                   |                                 |                      |                                                   | (57) |
| Haque SM        | Identification of bacterial isolates in neonatal sepsis and their antimicrobial susceptibility                                                           | 2014             | CLSI (NCCLS)         | Not stated        | <i>Klebsiella pneumoniae</i>    | Ampicillin           | None                                              | (58) |
|                 |                                                                                                                                                          |                  |                      |                   | <i>Staphylococcus aureus</i>    | Beta-lactams         | None                                              |      |
| Heng BH         | Epidemiological surveillance of melioidosis in Singapore                                                                                                 | 1998             |                      |                   |                                 |                      |                                                   | (59) |
| Hoa NT          | Community-acquired septicaemia in southern Vietnam: the importance of multidrug-resistant <i>Salmonella typhi</i>                                        | 1998             | CLSI (NCCLS)         | 1993              | <i>Staphylococcus aureus</i>    | Beta-lactams         | Reports methicillin but not oxacillin / cefoxitin | (60) |
| Hsu LY          | Six cases of daptomycin-non-susceptible <i>Staphylococcus aureus</i> bacteraemia in Singapore                                                            | 2010             | Not stated           |                   |                                 |                      |                                                   | (61) |
| Imran MN        | Early predictors of mortality in pneumococcal bacteraemia                                                                                                | 2005             | CLSI (NCCLS)         | 1990              | <i>Streptococcus pneumoniae</i> | Penicillin           | None                                              | (62) |
| Iqbal Hossain M | <i>Acinetobacter</i> bacteremia in patients with diarrhoeal disease                                                                                      | 1998             |                      |                   |                                 |                      |                                                   | (63) |
| Jain N          | <i>Globicatella sanguinis</i> meningitis in a post head trauma patient: first case report from Asia                                                      | 2012             | CLSI (NCCLS)         | 2009              |                                 |                      |                                                   | (64) |
| Jesudason MV    | Septicaemic melioidosis in a tertiary care hospital in south India                                                                                       | 2003             | Not stated           |                   |                                 |                      |                                                   | (65) |
| Jitsurong S     | Prevalence of extended-spectrum beta-lactamases (ESBLs) produced in blood isolates of gram-negative bacteria in a teaching hospital in Southern Thailand | 2006             | CLSI (NCCLS)         | 2000              | <i>Klebsiella pneumoniae</i>    | Ampicillin           | None                                              | (66) |
| Kabra SK        | Multidrug-resistant typhoid fever                                                                                                                        | 2000             | Not stated           |                   | <i>Salmonellae</i>              | Gentamicin           | Reports result (and susceptible isolates)         | (67) |
| Kamili MA       | Multiple drug resistant typhoid fever outbreak in Kashmir Valley                                                                                         | 1993             |                      |                   |                                 |                      |                                                   | (68) |
| Kapoor L        | Microbiological profile of neonatal septicemia in a pediatric care hospital in Delhi                                                                     | 2005             | Stokes               | Not applicable    | <i>Staphylococcus aureus</i>    | Beta-lactams         | Does not report oxacillin / cefoxitin             | (69) |
| Karki AB        | Higher nalidixic acid resistance pattern of <i>Salmonella</i> isolates                                                                                   | 2013             | Not stated           |                   |                                 |                      |                                                   | (70) |

| First author    | Manuscript title                                                                                                                      | Publication year | Stated AST guideline  | Guideline version | Target organism                 | Target antimicrobial | Problem identified                        | Ref. |
|-----------------|---------------------------------------------------------------------------------------------------------------------------------------|------------------|-----------------------|-------------------|---------------------------------|----------------------|-------------------------------------------|------|
|                 | from enteric fever patients in Kathmandu Model Hospital, Nepal                                                                        |                  |                       |                   |                                 |                      |                                           |      |
| Karki S         | Bacteriological analysis and antibiotic sensitivity pattern of blood culture isolates in Kanti Children Hospital                      | 2010             |                       |                   | <i>Klebsiella pneumoniae</i>    | Ampicillin           | None                                      | (71) |
|                 |                                                                                                                                       |                  |                       |                   | <i>Streptococcus pneumoniae</i> | Penicillin           | None                                      |      |
| Karthikeyan G   | Neonatal sepsis: <i>Staphylococcus aureus</i> as the predominant pathogen                                                             | 2001             |                       |                   | <i>Klebsiella pneumoniae</i>    | Ampicillin           | Reports susceptible isolates              | (72) |
|                 |                                                                                                                                       |                  |                       |                   | <i>Staphylococcus aureus</i>    | Beta-lactams         | Does not report oxacillin / ceftoxitin    |      |
| Kasper MR       | Emergence of multidrug-resistant <i>Salmonella enterica</i> serovar Typhi with reduced susceptibility to fluoroquinolones in Cambodia | 2010             | CLSI (NCCLS)          | 2009              |                                 |                      |                                           | (73) |
| Khairulddin NYN | Epidemiology of <i>Haemophilus influenzae</i> invasive disease in hospitalised Kelantanese children, 1985-1994                        | 1999             | Stokes                | Not applicable    |                                 |                      |                                           | (74) |
| Khan MI         | Non-typhoidal <i>Salmonella</i> rates in febrile children at sites in five Asian countries                                            | 2010             |                       |                   |                                 |                      |                                           | (75) |
| Komolpis P      | <i>Salmonella</i> bacteremia: serotype distribution and antimicrobial susceptibility during 1991-1995                                 | 1999             | Not stated            |                   | <i>Salmonellae</i>              | Gentamicin           | Reports result (and susceptible isolates) | (76) |
| Kruse AY        | Neonatal bloodstream infections in a pediatric hospital in Vietnam: a cohort study                                                    | 2013             | CLSI (NCCLS)          | 2008              | <i>Staphylococcus aureus</i>    | Beta-lactams         | None                                      | (77) |
| Kumar A         | An outbreak of multidrug resistant <i>Salmonella typhimurium</i> in a nursery                                                         | 1995             |                       |                   | <i>Salmonellae</i>              | Gentamicin           | Reports result (and susceptible isolates) | (78) |
| Kumarasamy K    | Report of a <i>Salmonella enterica</i> serovar Typhi isolate from India producing CMY-2 AmpC beta-lactamase                           | 2012             | CLSI (NCCLS) / EUCAST | 2011 / 2011       | <i>Salmonellae</i>              | Gentamicin           | Reports result (and susceptible isolates) | (79) |
| Lee WS          | Antimicrobial susceptibility and distribution of non-typhoidal <i>Salmonella</i> serovars isolated in Malaysian children              | 2003             | CLSI (NCCLS)          | Not stated        | <i>Salmonellae</i>              | Gentamicin           | Reports result (and susceptible isolates) | (80) |
| Lim NL          | Bacteraemic infections in a neonatal intensive care unit--a nine-month survey                                                         | 1995             |                       |                   |                                 |                      |                                           | (81) |
| Litzow JM       | High frequency of multidrug-resistant gram-negative rods in two neonatal intensive care units in the Philippines                      | 2009             | Not stated            |                   |                                 |                      |                                           | (82) |
| Lulitanond A    | Virulence genes and genotypes of <i>Staphylococcus aureus</i> from blood of Thai patients                                             | 2015             | CLSI (NCCLS)          | 2010              | <i>Staphylococcus aureus</i>    | Beta-lactams         | None                                      | (83) |
| Lupisan SP      | Invasive bacterial infections of children in a rural province in the central Philippines                                              | 2000             | CLSI (NCCLS)          | Not stated        | <i>Streptococcus pneumoniae</i> | Penicillin           | None                                      | (84) |

| First author | Manuscript title                                                                                                                                                  | Publication year | Stated AST guideline | Guideline version | Target organism                                                 | Target antimicrobial       | Problem identified                                                                        | Ref. |
|--------------|-------------------------------------------------------------------------------------------------------------------------------------------------------------------|------------------|----------------------|-------------------|-----------------------------------------------------------------|----------------------------|-------------------------------------------------------------------------------------------|------|
| Manchanda V  | Treatment of enteric fever in children on the basis of current trends of antimicrobial susceptibility of <i>Salmonella enterica</i> serovar Typhi and Paratyphi A | 2006             | CLSI (NCCLS)         | 2004              | <i>Salmonellae</i>                                              | Gentamicin                 | Reports result (and susceptible isolates)                                                 | (85) |
| Maskey AP    | <i>Salmonella enterica</i> serovar Paratyphi A and <i>S. enterica</i> serovar Typhi cause indistinguishable clinical syndromes in Kathmandu, Nepal                | 2006             | CLSI (NCCLS)         | 2003              |                                                                 |                            |                                                                                           | (86) |
| Maskey AP    | Emerging trends in enteric fever in Nepal: 9124 cases confirmed by blood culture 1993-2003                                                                        | 2008             | CLSI (NCCLS)         | 2000              |                                                                 |                            |                                                                                           | (87) |
| Mehar V      | Neonatal sepsis in a tertiary care center in central India: microbiological profile, antimicrobial sensitivity pattern and outcome                                | 2013             |                      |                   | <i>Staphylococcus aureus</i>                                    | Beta-lactams               | Does not report oxacillin / ceftazidime but AST done by VITEK (MRSA reported incorrectly) | (88) |
| Mehar V      | <i>Pantoea dispersa</i> : an unusual cause of neonatal sepsis                                                                                                     | 2013             |                      |                   |                                                                 |                            |                                                                                           | (89) |
| Mishra S     | Multidrug resistant typhoid fever: therapeutic considerations                                                                                                     | 1992             |                      |                   | <i>Salmonellae</i>                                              | Gentamicin                 | Reports result (and susceptible isolates)                                                 | (90) |
| Mohanty S    | Antibiogram pattern and seasonality of <i>Salmonella</i> serotypes in a North Indian tertiary care hospital                                                       | 2006             | CLSI (NCCLS)         | 2004              |                                                                 |                            |                                                                                           | (91) |
| Mohanty S    | Bacteriology of parapneumonic pleural effusions in an Indian hospital                                                                                             | 2007             | CLSI (NCCLS)         | Not stated        | <i>Staphylococcus aureus</i><br><i>Streptococcus pneumoniae</i> | Beta-lactams<br>Penicillin | Reports methicillin but not oxacillin / ceftazidime                                       | (92) |
| Mortlock S   | Bacteraemia among patients attending a cancer hospital in Lahore, Pakistan                                                                                        | 2000             | CLSI (NCCLS)         | 1988              | <i>Staphylococcus aureus</i>                                    | Beta-lactams               | Reports methicillin but not oxacillin / ceftazidime                                       | (93) |
| Muhammad Z   | Neonatal sepsis: causative bacteria and their resistance to antibiotics                                                                                           | 2010             |                      |                   | <i>Staphylococcus aureus</i>                                    | Beta-lactams               | Does not report oxacillin / ceftazidime; reports ceftazidime                              | (94) |
| Muley VA     | Bacteriological profile of neonatal septicemia in a tertiary care hospital from Western India                                                                     | 2015             | CLSI (NCCLS)         | 2011              | <i>Klebsiella pneumoniae</i><br><i>Staphylococcus aureus</i>    | Ampicillin<br>Beta-lactams | Reports susceptible isolates<br>Does not report oxacillin / ceftazidime                   | (95) |
| Murdoch DR   | The etiology of febrile illness in adults presenting to Patan Hospital in Kathmandu, Nepal                                                                        | 2004             | CLSI (NCCLS)         | 2000              |                                                                 |                            |                                                                                           | (96) |
| Naheed A     | Burden of typhoid and paratyphoid fever in a densely populated urban community, Dhaka, Bangladesh                                                                 | 2010             | CLSI (NCCLS)         | 2006              |                                                                 |                            |                                                                                           | (97) |
| Najeeb S     | Causative bacteria and antibiotic resistance in neonatal sepsis                                                                                                   | 2012             |                      |                   | <i>Staphylococcus aureus</i>                                    | Beta-lactams               | Does not report oxacillin / ceftazidime; reports ceftazidime                              | (98) |
| Nakwan N     | Clinical features, risk factors, and outcome of carbapenem-resistant                                                                                              | 2012             | CLSI (NCCLS)         | 2010              |                                                                 |                            |                                                                                           | (99) |

| First author  | Manuscript title                                                                                                                                                            | Publication year | Stated AST guideline | Guideline version                         | Target organism              | Target antimicrobial | Problem identified                        | Ref.  |
|---------------|-----------------------------------------------------------------------------------------------------------------------------------------------------------------------------|------------------|----------------------|-------------------------------------------|------------------------------|----------------------|-------------------------------------------|-------|
|               | <i>Acinetobacter baumannii</i> bacteremia in a Thai neonatal intensive care unit                                                                                            |                  |                      |                                           |                              |                      |                                           |       |
| Nandhakumar B | Penicillin-resistant viridans group streptococci from blood cultures of infective endocarditis patients in South India                                                      | 2008             | CLSI (NCCLS)         | 2007                                      |                              |                      |                                           | (100) |
| Nema S        | Antibiogram study over bacterial isolates from cases of bacteraemias                                                                                                        | 1996             |                      |                                           | <i>Salmonellae</i>           | Gentamicin           | Reports result (and susceptible isolates) | (101) |
| Neopane A     | Changing spectrum of antibiotic sensitivity in enteric fever                                                                                                                | 2008             |                      |                                           |                              |                      |                                           | (102) |
| Nickerson EK  | <i>Staphylococcus aureus</i> bacteraemia in a tropical setting: patient outcome and impact of antibiotic resistance                                                         | 2009             |                      |                                           | <i>Staphylococcus aureus</i> | Beta-lactams         | None                                      | (103) |
| Ochiai RL     | A study of typhoid fever in five Asia countries: disease burden and implications for controls                                                                               | 2008             | Not stated           |                                           |                              |                      |                                           | (104) |
| Ong C WM      | Severe community-acquired <i>Acinetobacter baumannii</i> pneumonia: an emerging highly lethal infectious disease in the Asia-Pacific                                        | 2009             | CLSI (NCCLS)         | Not stated                                |                              |                      |                                           | (105) |
| Pais M        | Neonatal sepsis, bacterial isolates and antibiotic susceptibility patterns among neonates                                                                                   | 2012             |                      |                                           | <i>Staphylococcus aureus</i> | Beta-lactams         | Does not report oxacillin / ceftazidime   | (106) |
| Palash S      | Emerging resistance of non-fermenting gram negative bacilli in a tertiary care centre                                                                                       | 2011             | CLSI (NCCLS)         | 2007                                      |                              |                      |                                           | (107) |
| Pancharoen C  | Meningococcal infection in children                                                                                                                                         | 1998             | CLSI (NCCLS)         | Not stated but did define MIC breakpoints |                              |                      |                                           | (108) |
| Pandit V      | Study of clinical profile and antibiotic sensitivity in paratyphoid fever cases admitted at teaching hospital in South India                                                | 2012             |                      |                                           |                              |                      |                                           | (109) |
| Parveen RM    | Extended-spectrum beta-lactamase producing <i>Klebsiella pneumoniae</i> from blood cultures in Puducherry, India                                                            | 2011             | CLSI (NCCLS)         | 2007                                      |                              |                      |                                           | (110) |
| Pathengay A   | Clinical and microbiologic review of culture-proven endophthalmitis caused by multidrug-resistant bacteria in patients seen at a tertiary eye care center in southern India | 2011             |                      |                                           |                              |                      |                                           | (111) |
| Phan LT       | Genetic and phenotypic characterization of <i>Haemophilus influenzae</i> type b isolated from                                                                               | 2006             |                      |                                           |                              |                      |                                           | (112) |

| First author  | Manuscript title                                                                                                                                                                                                                    | Publication year | Stated AST guideline | Guideline version | Target organism                 | Target antimicrobial | Problem identified                                                                              | Ref.  |
|---------------|-------------------------------------------------------------------------------------------------------------------------------------------------------------------------------------------------------------------------------------|------------------|----------------------|-------------------|---------------------------------|----------------------|-------------------------------------------------------------------------------------------------|-------|
|               | children with meningitis and their family members in Vietnam                                                                                                                                                                        |                  |                      |                   |                                 |                      |                                                                                                 |       |
| Phe T         | Does HIV status affect the aetiology, bacterial resistance patterns and recommended empiric antibiotic treatment in adult patients with bloodstream infection in Cambodia?                                                          | 2013             | CLSI (NCCLS)         | 2012              | <i>Staphylococcus aureus</i>    | Beta-lactams         | None                                                                                            | (113) |
| Phetsouvanh R | Causes of community-acquired bacteremia and patterns of antimicrobial resistance in Vientiane, Laos                                                                                                                                 | 2006             | CLSI (NCCLS)         | 1998              | <i>Klebsiella pneumoniae</i>    | Ampicillin           | Reports susceptible isolates                                                                    | (114) |
|               |                                                                                                                                                                                                                                     |                  |                      |                   | <i>Staphylococcus aureus</i>    | Beta-lactams         | Does not report oxacillin / ceftioxin                                                           |       |
|               |                                                                                                                                                                                                                                     |                  |                      |                   | <i>Streptococcus pneumoniae</i> | Penicillin           | Incomplete testing of oxacillin non-susceptible isolates (penicillin MIC only done on a subset) |       |
| Pocock JM     | Septic arthritis of the hip in a Cambodian child caused by multidrug-resistant <i>Salmonella enterica</i> serovar Typhi with intermediate susceptibility to ciprofloxacin treated with ceftriaxone and azithromycin                 | 2014             |                      |                   |                                 |                      |                                                                                                 | (115) |
| Pokharel BM   | Multidrug-resistant and extended-spectrum beta-lactamase (ESBL)-producing <i>Salmonella enterica</i> (serotypes Typhi and Paratyphi A) from blood isolates in Nepal: surveillance of resistance and a search for newer alternatives | 2006             | CLSI (NCCLS)         | 2004              |                                 |                      |                                                                                                 | (116) |
| Pokharel P    | Study of enteric fever and antibiogram of <i>Salmonella</i> isolates at a teaching hospital in Kathmandu Valley                                                                                                                     | 2009             |                      |                   | <i>Salmonellae</i>              | Gentamicin           | Reports result (and susceptible isolates)                                                       | (117) |
| Porter KA     | <i>Acinetobacter</i> bacteraemia in Thailand: evidence for infections outside the hospital setting                                                                                                                                  | 2014             | CLSI (NCCLS)         | 2012              |                                 |                      |                                                                                                 | (118) |
| Pradhan R     | Bloodstream infection among children presenting to a general hospital outpatient clinic in urban Nepal                                                                                                                              | 2012             | CLSI (NCCLS)         | 2006              | <i>Streptococcus pneumoniae</i> | Penicillin           | None                                                                                            | (119) |
| Punpanich W   | Invasive salmonellosis in urban Thai children: a ten-year review                                                                                                                                                                    | 2012             |                      |                   |                                 |                      |                                                                                                 | (120) |
| Qamar FN      | A three-year review of antimicrobial resistance of <i>Salmonella enterica</i> serovars Typhi and Paratyphi A in Pakistan                                                                                                            | 2014             | CLSI (NCCLS)         | 2009              |                                 |                      |                                                                                                 | (121) |
| Qamar MU      | Metallo-beta-lactamase producing <i>Enterobacter cloacae</i> : an emerging threat in neonates                                                                                                                                       | 2014             | CLSI (NCCLS)         | 2009              |                                 |                      |                                                                                                 | (122) |
| Rai S         | Rationale of azithromycin prescribing practices for enteric fever in India                                                                                                                                                          | 2012             | CLSI (NCCLS) / BSAC  | 2009 / 2010       |                                 |                      |                                                                                                 | (123) |

| First author | Manuscript title                                                                                                                                                                                      | Publication year | Stated AST guideline  | Guideline version | Target organism                 | Target antimicrobial | Problem identified                        | Ref.  |
|--------------|-------------------------------------------------------------------------------------------------------------------------------------------------------------------------------------------------------|------------------|-----------------------|-------------------|---------------------------------|----------------------|-------------------------------------------|-------|
| Rao RS       | A study of drug resistance among <i>Salmonella typhi</i> and <i>Salmonella paratyphi A</i> in an endemic area, 1977-79                                                                                | 1981             |                       |                   |                                 |                      |                                           | (124) |
| Raza S       | Antimicrobial susceptibility patterns of <i>Salmonella typhi</i> and <i>Salmonella paratyphi A</i> in a tertiary care hospital                                                                        | 2012             | CLSI (NCCLS)          | 1997              | <i>Salmonellae</i>              | Gentamicin           | Reports result (and susceptible isolates) | (125) |
| Renuka K     | Reduced susceptibility to ciprofloxacin and gyra gene mutation in North Indian strains of <i>Salmonella enterica</i> serotype Typhi and serotype Paratyphi A                                          | 2004             | CLSI (NCCLS)          | 2002              |                                 |                      |                                           | (126) |
| Rhodes J     | Pneumococcal bacteremia requiring hospitalization in rural Thailand: an update on incidence, clinical characteristics, serotype distribution, and antimicrobial susceptibility, 2005-2010             | 2013             | CLSI (NCCLS)          | 2008              | <i>Streptococcus pneumoniae</i> | Penicillin           | None                                      | (127) |
| Roy S        | Tigecycline susceptibility in <i>Klebsiella pneumoniae</i> and <i>Escherichia coli</i> causing neonatal septicaemia (2007-10) and role of an efflux pump in tigecycline non-susceptibility            | 2013             | CLSI (NCCLS) / EUCAST | 2008 / 2011       |                                 |                      |                                           | (128) |
| Sharma NP    | A hospital-based study of bloodstream infections in febrile patients in Dhulikhel Hospital Kathmandu University Teaching Hospital, Nepal                                                              | 2006             |                       |                   |                                 |                      |                                           | (129) |
| Sharma P     | <i>Staphylococcus aureus</i> - the predominant pathogen in the neonatal ICU of a tertiary care hospital in Amritsar, India                                                                            | 2013             | CLSI (NCCLS)          | 2007              | <i>Staphylococcus aureus</i>    | Beta-lactams         | None                                      | (130) |
| Shaw P       | Microbial array and antibiotic sensitivity pattern of catheter related blood-stream infection at a tertiary care hospital in South India                                                              | 2012             |                       |                   |                                 |                      |                                           | (131) |
| Sheikh A     | <i>Salmonella enterica</i> serovar Typhi-specific immunoglobulin A antibody responses in plasma and antibody in lymphocyte supernatant specimens in Bangladeshi patients with suspected typhoid fever | 2009             |                       |                   | <i>Salmonellae</i>              | Gentamicin           | Reports result (and susceptible isolates) | (132) |
| Sheikh AN    | Neonatal sepsis: An evaluation of bacteriological spectrum, antibiotic susceptibilities and prognostic predictors at Civil Hospital, Karachi                                                          | 2014             |                       |                   | <i>Staphylococcus aureus</i>    | Beta-lactams         | Does not report oxacillin / ceftoxitin    | (133) |
| Sheikh SO    | High rate of non-susceptibility to metronidazole and clindamycin in                                                                                                                                   | 2015             | CLSI (NCCLS)          | 2012              |                                 |                      |                                           | (134) |

| First author    | Manuscript title                                                                                                                                              | Publication year | Stated AST guideline | Guideline version | Target organism                 | Target antimicrobial | Problem identified                                | Ref.  |
|-----------------|---------------------------------------------------------------------------------------------------------------------------------------------------------------|------------------|----------------------|-------------------|---------------------------------|----------------------|---------------------------------------------------|-------|
|                 | anaerobic isolates: data from a clinical laboratory from Karachi, Pakistan                                                                                    |                  |                      |                   |                                 |                      |                                                   |       |
| Shenoy S        | Penicillin resistant <i>Streptococcus pneumoniae</i>                                                                                                          | 2003             | CLSI (NCCLS)         | 1995              | <i>Streptococcus pneumoniae</i> | Oxacillin            | None                                              | (135) |
| Shivaprakasha S | Late prosthetic valve endocarditis due to <i>Cardiobacterium hominis</i> , an unusual complication                                                            | 2007             |                      |                   |                                 |                      |                                                   | (136) |
| Shivaprakasha S | Cerebral artery mycotic aneurysm associated with <i>Erysipelothrix rhusiopathiae</i> endocarditis                                                             | 2007             |                      |                   |                                 |                      |                                                   | (137) |
| Shoma S         | Rapid detection of <i>Haemophilus influenzae</i> type b in Bangladeshi children with pneumonia and meningitis by PCR and analysis of antimicrobial resistance | 2001             |                      |                   |                                 |                      |                                                   | (138) |
| Shrestha RK     | Bacteriological study of neonatal sepsis and antibiotic susceptibility pattern of isolates in Kathmandu, Nepal                                                | 2013             | CLSI (NCCLS)         | 2006              | <i>Klebsiella pneumoniae</i>    | Ampicillin           | Reports susceptible isolates                      | (139) |
|                 |                                                                                                                                                               |                  |                      |                   | <i>Salmonellae</i>              | Gentamicin           | Reports result (and susceptible isolates)         |       |
|                 |                                                                                                                                                               |                  |                      |                   | <i>Staphylococcus aureus</i>    | Beta-lactams         | Does not report oxacillin / cefoxitin             |       |
| Shrestha S      | Antibiotic resistance pattern of bacterial isolates in neonatal care unit                                                                                     | 2010             |                      |                   | <i>Staphylococcus aureus</i>    | Beta-lactams         | Does not report oxacillin / cefoxitin             | (140) |
| Shrestha S      | Bacterial isolates and its antibiotic susceptibility pattern in NICU                                                                                          | 2013             |                      |                   | <i>Staphylococcus aureus</i>    | Beta-lactams         | Does not report oxacillin / cefoxitin             | (141) |
| Shwe TN         | Blood culture isolates from children admitted to Medical Unit III, Yangon Children's Hospital, 1998                                                           | 2002             |                      |                   | <i>Salmonellae</i>              | Gentamicin           | Reports result (and susceptible isolates)         | (142) |
|                 |                                                                                                                                                               |                  |                      |                   | <i>Staphylococcus aureus</i>    | Beta-lactams         | Does not report oxacillin / cefoxitin             |       |
| Singh SD        | Enteric fever in Children at Dhulikhel Hospital                                                                                                               | 2012             |                      |                   | <i>Salmonellae</i>              | Gentamicin           | Reports result (and susceptible isolates)         | (143) |
| Singh UK        | <i>Salmonella typhi</i> infections and effect of fluoroquinolones and third generation cephalosporins in clinical outcome                                     | 2011             |                      |                   |                                 |                      |                                                   | (144) |
| Singhal L       | Trends in antimicrobial susceptibility of <i>Salmonella</i> Typhi from North India (2001-2012)                                                                | 2014             | CLSI (NCCLS)         | 2012              |                                 |                      |                                                   | (145) |
| Singhi S        | Nosocomial bloodstream infection in a pediatric intensive care unit                                                                                           | 2008             |                      |                   | <i>Staphylococcus aureus</i>    | Beta-lactams         | Reports methicillin but not oxacillin / cefoxitin | (146) |
| Singla N        | Outbreak of <i>Salmonella</i> Typhi enteric fever in sub-urban area of North India: a public health perspective                                               | 2013             | CLSI (NCCLS)         | 2009              |                                 |                      |                                                   | (147) |
| Srifuengfung S  | <i>Salmonella</i> meningitis and antimicrobial susceptibilities                                                                                               | 2005             | CLSI (NCCLS)         | 2003              |                                 |                      |                                                   | (148) |
| Srifuengfung S  | <i>Roseomonas gilardii</i> subsp <i>rosea</i> , a pink bacterium associated with bacteremia: the first case in Thailand                                       | 2007             | CLSI (NCCLS)         | 2006              |                                 |                      |                                                   | (149) |

| First author        | Manuscript title                                                                                                                                | Publication year | Stated AST guideline | Guideline version | Target organism              | Target antimicrobial | Problem identified                        | Ref.  |
|---------------------|-------------------------------------------------------------------------------------------------------------------------------------------------|------------------|----------------------|-------------------|------------------------------|----------------------|-------------------------------------------|-------|
| Sudhalkar A         | <i>Pantoea agglomerans</i> endophthalmitis: clinical features and outcomes                                                                      | 2014             |                      |                   |                              |                      |                                           | (150) |
| Takpere AY          | Bacterial isolates, risk factors and antibiogram of neonatal septicemia                                                                         | 2014             |                      |                   |                              |                      |                                           | (151) |
| Talawadekar NN      | Chloramphenicol resistant <i>Salmonella</i> species isolated between 1978 and 1987                                                              | 1989             |                      |                   |                              |                      |                                           | (152) |
| Tankhiwale SS       | An unusually high occurrence of <i>Salmonella enterica</i> serotype Paratyphi A in patients with enteric fever                                  | 2003             |                      |                   |                              |                      |                                           | (153) |
| Tarai B             | <i>Hemophilus influenzae</i> meningitis and septicaemia in a 14-month-old child after primary immunisation                                      | 2015             | CLSI (NCCLS)         | 2012              |                              |                      |                                           | (154) |
| Thananki RB         | "Danger in the blood" BSI and current trend in antimicrobial resistance                                                                         | 2014             |                      |                   | <i>Klebsiella pneumoniae</i> | Ampicillin           | Reports susceptible isolates              | (155) |
|                     |                                                                                                                                                 |                  |                      |                   | <i>Staphylococcus aureus</i> | Beta-lactams         | Reports ceftazidime                       |       |
| Thomas K            | Invasive pneumococcal disease associated with high case fatality in India                                                                       | 2013             | CLSI (NCCLS)         | 2008              |                              |                      |                                           | (156) |
| Threlfall EJ        | Widespread occurrence of multiple drug-resistant <i>Salmonella typhi</i> in India                                                               | 1992             |                      |                   |                              |                      |                                           | (157) |
| Tiwari DK           | A study on the bacteriological profile and antibiogram of bacteremia in children below 10 years in a tertiary care hospital in Bangalore, India | 2013             | CLSI (NCCLS)         | 2012              | <i>Salmonellae</i>           | Gentamicin           | Reports result (and susceptible isolates) | (158) |
|                     |                                                                                                                                                 |                  |                      |                   | <i>Staphylococcus aureus</i> | Beta-lactams         | None                                      |       |
| Tiwari P            | Profile and sensitivity pattern of bacteria isolated from various cultures in a Tertiary Care Hospital in Delhi                                 | 2010             |                      |                   | <i>Staphylococcus aureus</i> | Beta-lactams         | None                                      | (159) |
| Tjoa E              | <i>Acinetobacter baumannii</i> : role in blood stream infection in Neonatal Unit, Dr Cipto Mangunkusumo Hospital, Jakarta, Indonesia            | 2013             | CLSI (NCCLS)         | 2010              |                              |                      |                                           | (160) |
| Treebupachatsakul P | Brain abscess due to <i>Listeria monocytogenes</i> : first case report in Thailand                                                              | 2006             | CLSI (NCCLS)         | 2004              |                              |                      |                                           | (161) |
| Tsering DC          | Bacteriological profile of septicemia and the risk factors in neonates and infants in Sikkim                                                    | 2011             | CLSI (NCCLS)         | Not stated        | <i>Salmonellae</i>           | Gentamicin           | Reports result                            | (162) |
|                     |                                                                                                                                                 |                  |                      |                   | <i>Staphylococcus aureus</i> | Beta-lactams         | None                                      |       |
| Turner P            | <i>Aeromonas</i> spp bacteremia in pregnant women, Thailand-Myanmar border, 2011                                                                | 2012             | CLSI (NCCLS)         | 2010              |                              |                      |                                           | (163) |
| Valsalan R          | Melioidosis masquerading as enteric fever                                                                                                       | 2008             |                      |                   |                              |                      |                                           | (164) |

| First author  | Manuscript title                                                                                                                                            | Publication year | Stated AST guideline | Guideline version | Target organism                 | Target antimicrobial    | Problem identified                                                                                         | Ref.  |
|---------------|-------------------------------------------------------------------------------------------------------------------------------------------------------------|------------------|----------------------|-------------------|---------------------------------|-------------------------|------------------------------------------------------------------------------------------------------------|-------|
| Vijayan AP    | <i>Chromobacterium violaceum</i> sepsis in an infant                                                                                                        | 2009             |                      |                   |                                 |                         |                                                                                                            | (165) |
| Visudhiphan P | <i>Salmonella</i> meningitis in Thai infants: clinical case reports                                                                                         | 1998             |                      |                   |                                 |                         |                                                                                                            | (166) |
| Viswanathan R | Profile of neonatal septicaemia at a district-level sick newborn care unit                                                                                  | 2012             | CLSI (NCCLS)         | 2008              |                                 |                         |                                                                                                            | (167) |
| Viswanathan R | Multi-drug resistant gram negative bacilli causing early neonatal sepsis in India                                                                           | 2012             | CLSI (NCCLS)         | 2008              |                                 |                         |                                                                                                            | (168) |
| Viswanathan R | Multi-drug-resistant, non-fermenting, gram-negative bacilli in neonatal sepsis in Kolkata, India: a 4-year study                                            | 2014             | CLSI (NCCLS)         | 2008              |                                 |                         |                                                                                                            | (169) |
| Waheed M      | The etiology of neonatal sepsis and patterns of antibiotic resistance                                                                                       | 2003             |                      |                   | <i>Staphylococcus aureus</i>    | Beta-lactams            | Does not report oxacillin / ceftaxime but reports ceftazidime                                              | (170) |
| Wain J        | Quantitation of bacteria in bone marrow from patients with typhoid fever: relationship between counts and clinical features                                 | 2001             | Not stated           |                   |                                 |                         |                                                                                                            | (171) |
| Walia M       | Current perspectives of enteric fever: a hospital-based study from India                                                                                    | 2005             | CLSI (NCCLS)         | 2000              |                                 |                         |                                                                                                            | (172) |
| Williams EJ   | Hospital-based surveillance of invasive pneumococcal disease among young children in urban Nepal                                                            | 2009             | CLSI (NCCLS)         | 2006              | <i>Streptococcus pneumoniae</i> | Penicillin              | None                                                                                                       | (173) |
| Win MM        | Pneumococcal infection in children attending Yangon Children's Hospital                                                                                     | 2014             | Not stated           |                   | <i>Streptococcus pneumoniae</i> | Gentamicin / Penicillin | Reports isolates susceptible to gentamicin and penicillin non-susceptibility on basis of disk testing only | (174) |
| Zakariya BP   | Neonatal sepsis in a tertiary care hospital in South India: bacteriological profile and antibiotic sensitivity pattern                                      | 2011             | CLSI (NCCLS)         | 2006              | <i>Streptococcus pneumoniae</i> | Oxacillin               | None                                                                                                       | (175) |
| Zaw Than H    | Detection of <i>Burkholderia pseudomallei</i> in patients with suppurative infections attending the Yangon General Hospital and New Yangon General Hospital | 2013             |                      |                   |                                 |                         |                                                                                                            | (176) |
| Zubair M      | Incidence of coagulase negative staphylococci in neonatal sepsis                                                                                            | 2011             | CLSI (NCCLS)         | 2010              |                                 |                         |                                                                                                            | (177) |

## References

1. Abdullah FE, Haider F, Fatima K, Irfan S, Iqbal MS. Enteric fever in Karachi: current antibiotic susceptibility of *Salmonellae* isolates. J Coll Physicians Surg Pak. 2012;22(3):147-50.
2. Achana V, Silpapojakul K, Thininta W, Kalnaowakul S. Acute *Pseudomonas pseudomallei* pneumonia and septicemia following aspiration of contaminated water: a case report. Southeast Asian J Trop Med Public Health. 1985;16(3):500-4.
3. Acharya D, Trakulsomboon S, Madhup SK, Korbsrisate S. Antibiotic susceptibility pattern and the indicator of decreased ciprofloxacin susceptibility of *Salmonella enterica* serovar Typhi isolated from Dhulikhel Hospital, Nepal. Jpn J Infect Dis. 2012;65(3):264-7.
4. Agnihotri N, Kaistha N, Gupta V. Antimicrobial susceptibility of isolates from neonatal septicemia. Jpn J Infect Dis. 2004;57(6):273-5.
5. Al-Ta'iar A, Hammoud MS, Cuiqing L, Lee JK, Lui KM, Nakwan N, et al. Neonatal infections in China, Malaysia, Hong Kong and Thailand. Arch Dis Child Fetal Neonatal Ed. 2013;98(3):F249-55.
6. Amatya NM, Shrestha B, Lekhak B. Etiological agents of bacteraemia and antibiotic susceptibility pattern in Kathmandu Model Hospital. J Nepal Med Assoc. 2007;46(167):112-8.
7. Anand AC. The anatomy of an epidemic (the final report on an epidemic of multidrug resistant enteric fever in eastern India). Trop Gastroenterol. 1993;14(1):21-7.
8. Anderson M, Luangxay K, Sisouk K, Vorlasan L, Soumphonphakdy B, Sengmouang V, et al. Epidemiology of bacteremia in young hospitalized infants in Vientiane, Laos, 2000-2011. J Trop Pediatr. 2014;60(1):10-6.
9. Anekthananon T, Ratanasuwan W, Techasathit W, Komolpis P, Dhiraputra C, Suwanagool S. Community-acquired *Klebsiella* bacteremia. J Infect Dis Antimicrob Agents. 2001;18:15-8.
10. Anjum P, Qureshi AH, Rafi S. Fluoroquinolone resistance in typhoidal *Salmonella* and its detection by nalidixic acid disc diffusion. J Pak Med Assoc. 2004;54(6):295-301.
11. Antony B, Pinto H, Dias M, Shetty AK, Scaria B, Kuruvilla T, et al. Spectrum of melioidosis in the suburbs of Mangalore, S west coast of India. Southeast Asian J Trop Med Public Health. 2010;41(1):169-74.
12. Anunnatsiri S, Chansung K, Chetchotisakd P, Sirijerachai C. Febrile neutropenia: a retrospective study in Srinagarind Hospital. J Infect Dis Antimicrob Agents. 1998;15:115-22.
13. Arafat MY, Sobur MA, Haq MA, Islam MN. Current pattern in antimicrobial susceptibility in enteric fever in a private medical college. Bangladesh J Med Sci. 2014;13:67-9.
14. Arifeen SE, Saha SK, Rahman S, Rahman KM, Rahman SM, Bari S, et al. Invasive pneumococcal disease among children in rural Bangladesh: results from a population-based surveillance. Clin Infect Dis. 2009;48 Suppl 2:S103-13.
15. Ariffin H, Ariffin W, Peng LH, Parasakthi N. Septicaemia in paediatric cancer patients: a 5-year surveillance study in university hospital, Kuala Lumpur, Malaysia. J Trop Pediatr. 1997;43(5):279-81.
16. Arora RK, Gupta A, Joshi NM, Kataria VK, Lall P, Anand AC. Multidrug resistant typhoid fever: study of an outbreak in Calcutta. Indian Pediatr. 1992;29(1):61-6.
17. Arora S, Gautam V, Ray P. Changing susceptibility patterns of nonfermenting Gram-negative bacilli. Indian J Med Microbiol. 2012;30(4):485-6.
18. Aurangzeb B, Hameed A. Neonatal sepsis in hospital-born babies: bacterial isolates and antibiotic susceptibility patterns. J Coll Physicians Surg Pak. 2003;13(11):629-32.
19. Ayyagari A, Pal N. Outbreak of typhoid fever due to multiresistant *Salmonella typhi* in northern India - a preliminary report. Trans R Soc Trop Med Hyg. 1991;85:302.
20. Bajracharya BL, Baral MR, Shakya S, Tuladhar P, Paudel M, Acharya B. Clinical profile and antibiotics response in typhoid fever. Kathmandu Univ Med J. 2006;4(1):25-9.

21. Baker S, Campbell JI, Stabler R, Nguyen HV, To DS, Nguyen DV, et al. Fatal wound infection caused by *Chromobacterium violaceum* in Ho Chi Minh City, Vietnam. *J Clin Microbiol*. 2008;46(11):3853-5.
22. Banerjee M, Sahu K, Bhattacharya S, Adhya S, Bhowmick P, Chakraborty P. Outbreak of neonatal septicemia with multidrug resistant *Klebsiella pneumoniae*. *Indian J Ped*. 1993;60:25-7.
23. Bankar S, De A, Baveja S. Study of ascitic fluid for diagnosis of Spontaneous Bacterial Peritonitis (SBP) in adult patients with cirrhosis. *Int J Med Appl Sci*. 2014;3:1-9.
24. Baskaran ND, Gan GG, Adeeba K, Sam IC. Bacteremia in patients with febrile neutropenia after chemotherapy at a university medical center in Malaysia. *Int J Infect Dis*. 2007;11(6):513-7.
25. Behera B, Prasad Babu TL, Kamalesh A, Reddy G. Ceftazidime resistance in *Burkholderia pseudomallei*: first report from India. *Asian Pac J Trop Med*. 2012;5(4):329-30.
26. Bhagawati G, Barkataki D, Hazarika NK. Study on isolates of acute meningitis in a tertiary care centre in Assam. *Int J Med Public Health*. 2014;4:446-50.
27. Bhagra S, Kanga A, Ganju SA, Sood A. Antibiotic susceptibility pattern of *Salmonella enterica* serovar Typhi and Paratyphi a from North India: The changing scenario. *Int J Pharma Bio Sci*. 2014;5:B1-B9.
28. Bhaskar MM, Harish BN. Changing paradigm of enterococcal infections. *Int J Pharma Bio Sci*. 2015;6:349-53.
29. Bhat KG, Paul C, Bhat MG. Neonatal bacteremia due to high level aminoglycoside resistant (HLAR) enterococci. *Indian J Pediatr*. 1997;64(4):537-9.
30. Bhattacharya SS, Das U. Occurrence of *Salmonella typhi* infection in Rourkela, Orissa. *Indian J Med Res*. 2000;111:75-6.
31. Bhattacharya SS, Das U, Choudhury BK. Occurrence & antibiogram of *Salmonella* Typhi & *S. Paratyphi A* isolated from Rourkela, Orissa. *Indian J Med Res*. 2011;133:431-3.
32. Bindu D, Chitrakleha S, Menezes GA, Illamani V. Bacterial profile and antibiotic susceptibility pattern of blood culture isolates from pediatric age group attending a tertiary care centre. *Res J Pharm Biol Chem Sci*. 2013;4:299-303.
33. Boonyagars L, Chongtrakool P, Watcharananan SP. Meningitis and spondylodiscitis due to *Streptococcus suis*. *J Infect Dis Antimicrob Agents*. 2010;27:129-33.
34. Butt T, Afzal RK, Ahmad RN, Hussain I, Anwar M. Central venous catheter-related bloodstream infections in cancer patients. *J Coll Physicians Surg Pak*. 2004;14:549-52.
35. Butt T, Ahmad RN, Salman M, Kazmi SY. Changing trends in drug resistance among typhoid *salmonellae* in Rawalpindi, Pakistan. *East Mediterr Health J*. 2005;11(5-6):1038-44.
36. Capoor MR, Nair D, Aggarwal P, Mathys V, Dehem M, Bifani PJ. *Salmonella enterica* serovar typhi: molecular analysis of strains with decreased susceptibility and resistant to ciprofloxacin in India from 2001-2003. *Braz J Infect Dis*. 2007;11(4):423-5.
37. Chaikittisuk N. *Salmonella* bacteremia in children: a changing pattern of antibiotic resistance. *J Infect Dis Antimicrob Agents*. 2000;17:23-7.
38. Chande C, Shrikhande S, Kapale S, Agrawal S, Fule RP. Change in antimicrobial resistance pattern of *Salmonella* Typhi in central India. *Indian J Med Res*. 2002;115:248-50.
39. Chim H, Song C. *Aeromonas* infection in critically ill burn patients. *Burns*. 2007;33(6):756-9.
40. Chlebicki MP, Ling ML, Koh TH, Hsu LY, Tan BH, How KB, et al. First outbreak of colonization and infection with vancomycin-resistant *Enterococcus faecium* in a tertiary care hospital in Singapore. *Infect Control Hosp Epidemiol*. 2006;27(9):991-3.
41. Chong CY, Koh-Cheng T, Yee-Hui M, Nancy TW. Invasive pneumococcal disease in Singapore children. *Vaccine*. 2008;26(27-28):3427-31.

42. Choudhary A, Gopalakrishnan R, Nambi PS, Ramasubramanian V, Ghafur KA, Thirunarayan MA. Antimicrobial susceptibility of *Salmonella enterica* serovars in a tertiary care hospital in southern India. *Indian J Med Res.* 2013;137(4):800-2.
43. Deris ZZ, Harun A, Omar M, Johari MR. The prevalence and risk factors of nosocomial *Acinetobacter* blood stream infections in tertiary teaching hospital in north-eastern Malaysia. *Trop Biomed.* 2009;26(2):123-9, 219-22.
44. Dhanashree B. Antibiotic susceptibility profile of *Salmonella enterica* serovars: trend over three years showing re-emergence of chloramphenicol sensitivity and rare serovars. *Indian J Med Sci.* 2007;61(10):576-9.
45. Duggal S, Duggal N, Charoo H, Mahajan RK. Recent outbreak of meningococcal meningitis--a microbiological study with brief review of literature. *J Commun Dis.* 2007;39(4):209-16.
46. Duggal S, Rongpharpi SR, Gur R, Nayar R, Arora VM. Etiology and susceptibility of blood stream infections in a Referral Hospital in North Delhi: A one year study. *Res J Pharm Biol Chem Sci.* 2014;5:1859-64.
47. Dutta S, Sur D, Manna B, Bhattacharya SK, Deen JL, Clemens JD. Rollback of *Salmonella enterica* serotype Typhi resistance to chloramphenicol and other antimicrobials in Kolkata, India. *Antimicrob Agents Chemother.* 2005;49(4):1662-3.
48. Easow JM, Joseph NM, Dhungel BA, Chapagain B, Shivananda PG. Blood stream infections among febrile patients attending a teaching hospital in Western Region of Nepal. *Australas Med J.* 2010;3:633-7.
49. Emary K, Moore CE, Chanpheaktra N, An KP, Chheng K, Sona S, et al. Enteric fever in Cambodian children is dominated by multidrug-resistant H58 *Salmonella enterica* serovar Typhi with intermediate susceptibility to ciprofloxacin. *Trans R Soc Trop Med Hyg.* 2012;106(12):718-24.
50. Geetha VK, Yugendran T, Srinivasan R, Harish BN. Plasmid-mediated quinolone resistance in typhoidal *Salmonellae*: a preliminary report from South India. *Indian J Med Microbiol.* 2014;32(1):31-4.
51. Geethu M, Prabhu N, Jasmine MK. Antimicrobial susceptibility trends among viridans streptococci isolates from cases of endocarditis from 2007-2009. *Ann Biol Res.* 2010;1:130-3.
52. Gopal Katherason S, Naing L, Jaalam K, Kamarul Iman Musa K, Nik Abdullah NM, Aiyar S, et al. Prospective surveillance of nosocomial device-associated bacteremia in three adult intensive units in Malaysia. *Trop Biomed.* 2010;27(2):308-16.
53. Gupta P, Murali MV, Faridi MM, Kaul PB, Ramachandran VG, Talwar V. Clinical profile of *Klebsiella* septicemia in neonates. *Indian J Pediatr.* 1993;60(4):565-72.
54. Gupta V, Kaur J, Chander J. An increase in enteric fever cases due to *Salmonella* Paratyphi A in & around Chandigarh. *Indian J Med Res.* 2009;129(1):95-8.
55. Gyawali N, Sanjana RK. Bacteriological profile and antibiogram of neonatal septicemia. *Indian J Ped.* 2013;80(5):371-4.
56. Habib AG, Tambyah PA. Community-acquired *Klebsiella pneumoniae* central nervous system infections in adults in Singapore. *Eur J Clin Microbiol Infect Dis.* 2003;22(8):486-8.
57. Halder D, Zainal N, Wah CM, Haq JA. Neonatal meningitis and septicaemia caused by *Burkholderia pseudomallei*. *Ann Trop Paediatr.* 2016;18(2):161-4.
58. Haque SM, Jahan N, Mannan MA, Hasan M, Begum M, Rob S, et al. Identification of bacterial isolates in neonatal sepsis and their antimicrobial susceptibility. *Mymensingh Med J.* 2014;23(4):709-14.
59. Heng BH, Goh KT, Yap EH, Loh H, Yeo M. Epidemiological surveillance of melioidosis in Singapore. *Ann Acad Med Singapore.* 1998;27(4):478-84.
60. Hoa NT, Diep TS, Wain J, Parry CM, Hien TT, Smith MD, et al. Community-acquired septicaemia in southern Viet Nam: the importance of multidrug-resistant *Salmonella typhi*. *Trans R Soc Trop Med Hyg.* 1998;92(5):503-8.

61. Hsu LY, Leong M, Balm M, Chan DS, Huggan P, Tan TY, et al. Six cases of daptomycin-non-susceptible *Staphylococcus aureus* bacteraemia in Singapore. *J Med Microbiol*. 2010;59(Pt 12):1509-13.
62. Imran MN, Leng PH, Yang S, Kurup A, Eng P. Early predictors of mortality in pneumococcal bacteraemia. *Ann Acad Med Singapore*. 2005;34(7):426-31.
63. Iqbal Hossain M, Iqbal Kabir AKM, Khan WA, Fuchs GJ. *Acinetobacter* bacteraemia in patients with diarrhoeal disease. *Epidemiol Infect*. 1998;120:139-42.
64. Jain N, Mathur P, Misra MC. *Globicatella sanguinis* meningitis in a post head trauma patient: first case report from Asia. *J Infect Dev Ctries*. 2012;6(7):592-4.
65. Jesudason MV, Anbarasu A, John TJ. Septicaemic melioidosis in a tertiary care hospital in south India. *Indian J Med Res*. 2003;117:119-21.
66. Jitsurong S, Yodsawat J. Prevalence of extended-spectrum beta-lactamases (ESBLs) produced in blood isolates of gram-negative bacteria in a teaching hospital in southern Thailand. *Southeast Asian J Trop Med Public Health*. 2006;37(1):131-5.
67. Kabra SK, Madhulika, Talati A, Soni N, Patel S, Modi RR. Multidrug-resistant typhoid fever. *Trop Doct*. 2000;30(4):195-7.
68. Kamili MA, Ali G, Shah MY, Rashid S, Khan S, Allaqaband GQ. Multiple drug resistant typhoid fever outbreak in Kashmir Valley. *Indian J Med Sci*. 1993;47(6):147-51.
69. Kapoor L, Randhawa VS, Deb M. Microbiological profile of neonatal septicemia in a pediatric care hospital in Delhi. *J Commun Dis*. 2005;37(3):227-32.
70. Karki AB, Bhatta DR, Shrestha B, Khatri B, Rai KR, Mukhiya RK, et al. Higher nalidixic acid resistance pattern of *Salmonella* isolates from enteric fever patients in Kathmandu Model Hospital Nepal. *Res J Pharm Biol Chem Sci*. 2013;4:1687-93.
71. Karki S, Manandhar R. Bacteriological Analysis and Antibiotic Sensitivity Pattern of Blood Culture Isolates in Kanti Children Hospital. *J Nepal Paediatr Soc*. 2010;30:94-7.
72. Karthikeyan G, Premkumar K. Neonatal sepsis: *Staphylococcus aureus* as the predominant pathogen. *Indian J Pediatr*. 2001;68(8):715-7.
73. Kasper MR, Sokhal B, Blair PJ, Wierzba TF, Putnam SD. Emergence of multidrug-resistant *Salmonella enterica* serovar Typhi with reduced susceptibility to fluoroquinolones in Cambodia. *Diagn Microbiol Infect Dis*. 2010;66(2):207-9.
74. Khairuddin NYN, Choo KE, Johari MR. Epidemiology of *Haemophilus influenzae* invasive disease in hospitalised Kelantanese children, 1985-1994. *Singapore Med J*. 1999;40:96-100.
75. Khan MI, Ochiai RL, von Seidlein L, Dong B, Bhattacharya SK, Agtini MD, et al. Non-typhoidal *Salmonella* rates in febrile children at sites in five Asian countries. *Trop Med Int Health*. 2010;15(8):960-3.
76. Komolpis P, Srifuengfung S, Dhiraputra C, Pingwang B. *Salmonella* bacteremia: serotype distribution and antimicrobial susceptibility during 1991-1995. *J Infect Dis Antimicrob Agents*. 1999;16:49-52.
77. Kruse AY, Thieu Chuong Do H, Phuong CN, Duc T, Graff Stensballe L, Prag J, et al. Neonatal bloodstream infections in a pediatric hospital in Vietnam: a cohort study. *J Trop Pediatr*. 2013;59(6):483-8.
78. Kumar A, Nath G, Bhatia BD, Bhargava V, Loiwal V. An outbreak of multidrug resistant *Salmonella typhimurium* in a nursery. *Indian Pediatr*. 1995;32(8):881-5.
79. Kumarasamy K, Krishnan P. Report of a *Salmonella enterica* serovar Typhi isolate from India producing CMY-2 AmpC beta-lactamase. *J Antimicrob Chemother*. 2012;67(3):775-6.
80. Lee WS, Puthuchery SD, Parasakthi N, Choo KE. Antimicrobial susceptibility and distribution of non-typhoidal *Salmonella* serovars isolated in Malaysian children. *J Trop Pediatr*. 2003;49(1):37-41.
81. Lim NL, Wong YH, Boo NY, Kasim MS, Chor CY. Bacteraemic infections in a neonatal intensive care unit--a nine-month survey. *Med J Malaysia*. 1995;50(1):59-63.

82. Litzow JM, Gill CJ, Mantaring JBV, Fox M, Mendoza M, Mendoza S, et al. High frequency of multi drug resistant Gram-negative rods in two neonatal intensive care units in the Philippines. *Infect Control Hosp Epidemiol.* 2009;30.
83. Lulitanond A, Kanyota R, Engchanil C, Chanawong A, Wilailuckana C, Tavichakontrakool R, et al. Virulence genes and genotypes of *Staphylococcus aureus* from blood of Thai patients. *ScienceAsia.* 2015;41:162-9.
84. Lupisan SP, Herva E, Sombrero LT, Quiambao BP, Capeding MR, Abuzejo PE, et al. Invasive bacterial infections of children in a rural province in the central Philippines. *Am J Trop Med Hyg.* 2000;62(3):341-6.
85. Manchanda V, Bhalla P, Sethi M, Sharma VK. Treatment of enteric fever in children on the basis of current trends of antimicrobial susceptibility of *Salmonella enterica* serovar Typhi and Paratyphi A. *Indian J Med Microbiol.* 2006;24(2):101-6.
86. Maskey AP, Day JN, Phung QT, Thwaites GE, Campbell JI, Zimmerman M, et al. *Salmonella enterica* serovar Paratyphi A and *S. enterica* serovar Typhi cause indistinguishable clinical syndromes in Kathmandu, Nepal. *Clin Infect Dis.* 2006;42(9):1247-53.
87. Maskey AP, Basnyat B, Thwaites GE, Campbell JI, Farrar JJ, Zimmerman MD. Emerging trends in enteric fever in Nepal: 9124 cases confirmed by blood culture 1993-2003. *Trans R Soc Trop Med Hyg.* 2008;102(1):91-5.
88. Mehar V, Yadav D, Somani P, Bhatambare G, Mulye S, Singh K. Neonatal sepsis in a tertiary care center in central India: microbiological profile, antimicrobial sensitivity pattern and outcome. *J Neonatal Perinatal Med.* 2013;6(2):165-72.
89. Mehar V, Yadav D, Sanghvi J, Gupta N, Singh K. *Pantoea dispersa*: an unusual cause of neonatal sepsis. *Braz J Infect Dis.* 2013;17(6):726-8.
90. Mishra S, Patwari AK, Anand VK, Pillai PK, Aneja S, Chandra J, et al. Multidrug resistant typhoid fever: therapeutic considerations. *Indian Pediatr.* 1992;29(4):443-8.
91. Mohanty S, Renuka K, Sood S, Das BK, Kapil A. Antibigram pattern and seasonality of *Salmonella* serotypes in a North Indian tertiary care hospital. *Epidemiol Infect.* 2006;134(5):961-6.
92. Mohanty S, Kapil A, Das BK. Bacteriology of parapneumonic pleural effusions in an Indian hospital. *Trop Doct.* 2007;37(4):228-9.
93. Mortlock S. Bacteraemia among patients attending a cancer hospital in Lahore, Pakistan. *Br J Biomed Sci.* 2000;57(2):119-25.
94. Muhammad Z, Ahmed A, Hayat U, Wazir MS, Waqas H, Zardad M, et al. Neonatal sepsis: causative bacteria and their resistance to antibiotics. *J Ayub Med Coll Abbottabad.* 2010;22:33-6.
95. Muley VA, Ghadage DP, Bhore AV. Bacteriological profile of neonatal septicemia in a tertiary care hospital from Western India. *J Glob Infect Dis.* 2015;7(2):75-7.
96. Murdoch DR, Woods CW, Zimmerman MD, Dull PM, Belbase RH, Keenan AJ, et al. The etiology of febrile illness in adults presenting to Patan hospital in Kathmandu, Nepal. *Am J Trop Med Hyg.* 2004;70(6):670-5.
97. Naheed A, Ram PK, Brooks WA, Hossain MA, Parsons MB, Talukder KA, et al. Burden of typhoid and paratyphoid fever in a densely populated urban community, Dhaka, Bangladesh. *Int J Infect Dis.* 2010;14 Suppl 3:e93-9.
98. Najeeb S, Gillani S, Rizvi SK, Ullah R, ur Rehman A. Causative bacteria and antibiotic resistance in neonatal sepsis. *J Ayub Med Coll Abbottabad.* 2012;24(3-4):131-4.
99. Nakwan N, Wannaro J, Nakwan N, Patungkalo W, Chokephaibulkit K. Clinical features, risk factors, and outcome of carbapenem-resistant *Acinetobacter baumannii* bacteremia in a Thai neonatal intensive care unit. *Asian Biomedicine.* 2012;6:473-9.

100. Nandhakumar B, Senthilkumar S, Menon T, Shanmugasundaram S. Penicillin-resistant viridans group streptococci from blood cultures of infective endocarditis patients in South India. *Int J Antimicrob Agents*. 2008;32(6):543-4.
101. Nema S, Chitnis DS. Antibiogram study over bacterial isolates from cases of bacteraemias. *Indian J Med Sci*. 1996;50(9):325-9.
102. Neopane A, Singh SB, Bhatta R, Dhital B, Karki DB. Changing spectrum of antibiotic sensitivity in enteric fever. *Kathmandu Univ Med J*. 2008;6(1):12-5.
103. Nickerson EK, Hongsuwan M, Limmathurotsakul D, Wuthiekanun V, Shah KR, Srisomang P, et al. *Staphylococcus aureus* bacteraemia in a tropical setting: patient outcome and impact of antibiotic resistance. *PLoS One*. 2009;4(1):e4308.
104. Ochiai RL, Acosta CJ, Danovaro-Holliday MC, Baiqing D, Bhattacharya SK, Agtini MD, et al. A study of typhoid fever in five Asian countries: disease burden and implications for controls. *Bull World Health Organ*. 2008;86(4):260-8.
105. Ong CW, Lye DC, Khoo KL, Chua GS, Yeoh SF, Leo YS, et al. Severe community-acquired *Acinetobacter baumannii* pneumonia: an emerging highly lethal infectious disease in the Asia-Pacific. *Respirology*. 2009;14(8):1200-5.
106. Pais M, Devi ES, Pai MV, Lewis L, Gorge A, Mayya SS, et al. Neonatal sepsis, bacterial isolates and antibiotic susceptibility patterns among neonates. *Nursing J India*. 2012;103(1):18-20.
107. Palash S, Vikas G, Rajni T, Pallab R. Emerging resistance of non-fermenting gram negative bacilli in a tertiary care centre. *Indian J Pathol Microbiol*. 2011;54:666-7.
108. Pancharoen C, Thisyakorn U. Meningococcal infection in children. *J Infect Dis Antimicrob Agents*. 1998:55-8.
109. Pandit V, Kumar A, Kulkarni MM, Pattanshetty SM, Samarasinghe C, Kamath S. Study of clinical profile and antibiotic sensitivity in paratyphoid fever cases admitted at teaching hospital in South India. *J Family Med Prim Care*. 2012;1(2):118-21.
110. Parveen RM, Khan MA, Menezes GA, Harish BN, Parija SC, Hays JP. Extended-spectrum  $\beta$ -lactamase producing *Klebsiella pneumoniae* from blood cultures in Puducherry, India. *Indian J Med Res*. 2011;134:392-5.
111. Pathengay A, Moreker MR, Puthussery R, Ambatipudi S, Jalali S, Majji AB, et al. Clinical and microbiologic review of culture-proven endophthalmitis caused by multidrug-resistant bacteria in patients seen at a tertiary eye care center in southern India. *Retina*. 2011;31(9):1806-11.
112. Phan LT, Ngo TT, Dang DA, Vu TT, Le NM, Tran QC, et al. Genetic and phenotypic characterization of *Haemophilus influenzae* type b isolated from children with meningitis and their family members in Vietnam. *Jpn J Infect Dis*. 2006;59(2):111-6.
113. Phe T, Vlieghe E, Reid T, Harries AD, Lim K, Thai S, et al. Does HIV status affect the aetiology, bacterial resistance patterns and recommended empiric antibiotic treatment in adult patients with bloodstream infection in Cambodia? *Trop Med Int Health*. 2013;18(4):485-94.
114. Phetsouvanh R, Phongmany S, Soukaloun D, Rasachak B, Soukhaseum V, Soukhaseum S, et al. Causes of community-acquired bacteremia and patterns of antimicrobial resistance in Vientiane, Laos. *Am J Trop Med Hyg*. 2006;75(5):978-85.
115. Pocock JM, Khun PA, Moore CE, Vuthy S, Stoesser N, Parry CM. Septic arthritis of the hip in a Cambodian child caused by multidrug-resistant *Salmonella enterica* serovar Typhi with intermediate susceptibility to ciprofloxacin treated with ceftriaxone and azithromycin. *Paediatr Int Child Health*. 2014;34(3):227-9.
116. Pokharel BM, Koirala J, Dahal RK, Mishra SK, Khadga PK, Tuladhar NR. Multidrug-resistant and extended-spectrum beta-lactamase (ESBL)-producing *Salmonella enterica* (serotypes Typhi and Paratyphi A) from blood isolates in Nepal: surveillance of resistance and a search for newer alternatives. *Int J Infect Dis*. 2006;10(6):434-8.

117. Pokharel P, Rai SK, Karki G, Katuwal A, Vitrakoti R, Shrestha SK. Study of enteric fever and antibiogram of *Salmonella* isolates at a teaching hospital in Kathmandu Valley. *Nepal Med Coll J*. 2009;11(3):176-8.
118. Porter KA, Rhodes J, Dejsirilert S, Henchaichon S, Siludjai D, Thamthitawat S, et al. *Acinetobacter* bacteraemia in Thailand: evidence for infections outside the hospital setting. *Epidemiol Infect*. 2014;142(6):1317-27.
119. Pradhan R, Shrestha U, Gautam SC, Thorson S, Shrestha K, Yadav BK, et al. Bloodstream infection among children presenting to a general hospital outpatient clinic in urban Nepal. *PLoS One*. 2012;7(10):e47531.
120. Punpanich W, Netsawang S, Thippated C. Invasive salmonellosis in urban Thai children: a ten-year review. *Pediatr Infect Dis J*. 2012;31(8):e105-10.
121. Qamar FN, Azmatullah A, Kazi AM, Khan E, Zaidi AK. A three-year review of antimicrobial resistance of *Salmonella enterica* serovars Typhi and Paratyphi A in Pakistan. *J Infect Dev Ctries*. 2014;8(8):981-6.
122. Qamar MU, Abdul H, Arshad MU, Muhammad A. Metallo-beta-lactamase producing *Enterobacter cloacae*: an emerging threat in neonates. *Afr J Microbiol Res*. 2014;8:525-8.
123. Rai S, Jain S, Prasad KN, Ghoshal U, Dhole TN. Rationale of azithromycin prescribing practices for enteric fever in India. *Indian J Med Microbiol*. 2012;30(1):30-3.
124. Rao RS, Sundararaj T, Subramanian S, Shankar V, Murty SA, Kapoor SC. A study of drug resistance among *Salmonella typhi* and *Salmonella paratyphi A* in an endemic area, 1977-79. *Trans R Soc Trop Med Hyg*. 1981;75(1):21-4.
125. Raza S, Tamrakar R, Bhatt CP, Joshi SK. Antimicrobial susceptibility patterns of *Salmonella typhi* and *Salmonella paratyphi A* in a tertiary care hospital. *J Nepal Health Res Counc*. 2012;10(22):214-7.
126. Renuka K, Kapil A, Kabra SK, Wig N, Das BK, Prasad VV, et al. Reduced susceptibility to ciprofloxacin and gyrA gene mutation in North Indian strains of *Salmonella enterica* serotype Typhi and serotype Paratyphi A. *Microb Drug Resist*. 2004;10(2):146-53.
127. Rhodes J, Dejsirilert S, Maloney SA, Jorakate P, Kaewpan A, Salika P, et al. Pneumococcal bacteremia requiring hospitalization in rural Thailand: an update on incidence, clinical characteristics, serotype distribution, and antimicrobial susceptibility, 2005-2010. *PLoS One*. 2013;8(6):e66038.
128. Roy S, Datta S, Viswanathan R, Singh AK, Basu S. Tigecycline susceptibility in *Klebsiella pneumoniae* and *Escherichia coli* causing neonatal septicaemia (2007-10) and role of an efflux pump in tigecycline non-susceptibility. *J Antimicrob Chemother*. 2013;68(5):1036-42.
129. Sharma NP, Peacock SJ, Phumratanaprapin W, Day N, White N, Pukrittayakamee S. A hospital-based study of bloodstream infections in febrile patients in Dhulikhel Hospital Kathmandu University Teaching Hospital, Nepal. *Southeast Asian J Trop Med Public Health*. 2006;37(2):351-6.
130. Sharma P, Kaur P, Aggarwal A. *Staphylococcus aureus* - the predominant pathogen in the neonatal ICU of a tertiary care hospital in Amritsar, India. *J Clin Diagn Res*. 2013;7(1):66-9.
131. Shaw P, Shaw CK, Saileela K. Microbial array and antibiotic sensitivity pattern of catheter related blood-stream infection at a tertiary care hospital in South India. *Int J Pharma Bio Sci*. 2012;3:100-7.
132. Sheikh A, Bhuiyan MS, Khanam F, Chowdhury F, Saha A, Ahmed D, et al. *Salmonella enterica* serovar Typhi-specific immunoglobulin A antibody responses in plasma and antibody in lymphocyte supernatant specimens in Bangladeshi patients with suspected typhoid fever. *Clin Vaccine Immunol*. 2009;16(11):1587-94.
133. Sheikh AN, Sajjad A, Hanif S. Neonatal sepsis: An evaluation of bacteriological spectrum, antibiotic susceptibilities and prognostic predictors at Civil Hospital, Karachi. *Pak Paed J*. 2014;38:143-55.

134. Sheikh SO, Jabeen K, Qaiser S, Ahsan ST, Khan E, Zafar A. High rate of non-susceptibility to metronidazole and clindamycin in anaerobic isolates: data from a clinical laboratory from Karachi, Pakistan. *Anaerobe*. 2015;33:132-6.
135. Shenoy S, Vandana KE. Penicillin Resistant *Streptococcus pneumoniae*. *Indian Pediatr*. 2003;40:587-8.
136. Shivaprakasha S, Radhakrishnan K, Kamath P, Karim PMS. Late prosthetic valve endocarditis due to *Cardiobacterium hominis*, an unusual complication. *Indian J Med Microbiol*. 2007;25(1):64-6.
137. Shivaprakasha S, Radhakrishnan K, Panikar D, Natarajan KU, Shamsul Karim PM. Cerebral artery mycotic aneurysm associated with *Erysipelothrix rhusiopathiae* endocarditis. *Infect Dis Clin Pract*. 2007;15:400-2.
138. Shoma S, Rahman M, Yasmin M. Rapid detection of *Haemophilus influenzae* type b in Bangladeshi children with pneumonia and meningitis by PCR and analysis of antimicrobial resistance. *J Health Popul Nutr*. 2001;19(4):268-74.
139. Shrestha RK, Rai SK, Khanal LK, Manda PK. Bacteriological study of neonatal sepsis and antibiotic susceptibility pattern of isolates in Kathmandu, Nepal. *Nepal Med Coll J*. 2013;15(1):71-3.
140. Shrestha S, Adhikari N, Rai BK, Shreepail A. Antibiotic resistance pattern of bacterial isolates in neonatal care unit. *J Nepal Med Assoc*. 2010;50(180):277-81.
141. Shrestha S, Shrestha NC, Dongol Singh S, Shrestha RPB, Kayestha S, Shrestha M, et al. Bacterial isolates and its antibiotic susceptibility pattern in NICU. *Kathmandu Univ Med J*. 2013;11:66-70.
142. Shwe TN, Nyein MM, Yi W, Mon A. Blood culture isolates from children admitted to Medical Unit III, Yangon Children's Hospital, 1998. *Southeast Asian J Trop Med Public Health*. 2002;33(4):764-71.
143. Singh DS, Shrestha S, Shrestha N, Manandhar S. Enteric fever in children at Dhulikhel hospital. *J Nepal Paediatr Soc*. 2012;32:216-20.
144. Singh UK, Neopane AK, Thapa M, Aryal N, Agrawal K. *Salmonella typhi* infections and effect of fluoroquinolones and third generation cephalosporins in clinical outcome. *J Nepal Paediatr Soc*. 2011;31:216-21.
145. Singhal L, Gupta PK, Kale P, Gautam V, Ray P. Trends in antimicrobial susceptibility of *Salmonella Typhi* from North India (2001-2012). *Indian J Med Microbiol*. 2014;32(2):149-52.
146. Singhi S, Ray P, Mathew JL, Jayashree M, Dhanalakshmi. Nosocomial bloodstream infection in a pediatric intensive care unit. *Indian J Pediatr*. 2008;75(1):25-30.
147. Singla N, Bansal N, Gupta V, Chander J. Outbreak of *Salmonella Typhi* enteric fever in sub-urban area of North India: a public health perspective. *Asian Pac J Trop Med*. 2013;6(2):167-8.
148. Srifuengfung S, Chokephaibulkit K, Yungyuen T, Tribuddharat C. *Salmonella* meningitis and antimicrobial susceptibilities. *Southeast Asian J Trop Med Public Health*. 2005;36(2):312-6.
149. Srifuengfung S, Tharavichitkul P, Pumprueg S, Tribuddharat C. *Roseomonas gilardii* subsp *rosea*, a pink bacterium associated with bacteremia: the first case in Thailand. *Southeast Asian J Trop Med Public Health*. 2007;38(5):886-91.
150. Sudhalkar A, Majji AB, Chhablani J, Manderwad G. *Pantoea agglomerans* endophthalmitis: clinical features and outcomes. *Retina*. 2014;34(8):1702-6.
151. Takpere AY, Kamble VS. Bacterial isolates, risk factors and antibiogram of neonatal septicemia. *Int J Pharma Bio Sci*. 2014;5:788-93.
152. Talawadkar NN, Vadher PJ, Antani DU, Kale VV, Kamat SA. Chloramphenicol resistant *Salmonella* species isolated between 1978 and 1987. *J Postgrad Med*. 1989;35(2):79-82.
153. Tankhiwale SS, Agrawal G, Jalgaonkar SV. An unusually high occurrence of *Salmonella enterica* serotype Paratyphi A in patients with enteric fever. *Indian J Med Res*. 2003;117:10-2.
154. Tarai B, Ravishankar N, Vohra P, Das P. *Haemophilus influenzae* meningitis and septicaemia in a 14-month-old child after primary immunisation. *Indian J Med Microbiol*. 2015;33(1):158-60.

155. Thananki RB, Kumari HP, Subbarayudu S. "Danger in the blood" BSI and current trend in antimicrobial resistance. *Int J Pharma Bio Sci.* 2014;5:827-34.
156. Thomas K, Mukkai Kesavan L, Veeraraghavan B, Jasmine S, Jude J, Shubankar M, et al. Invasive pneumococcal disease associated with high case fatality in India. *J Clin Epidemiol.* 2013;66(1):36-43.
157. Threlfall EJ, Ward LR, Rowe B, Raghupathi S, Chandrasekaran V, Vandepitte J, et al. Widespread occurrence of multiple drug-resistant *Salmonella typhi* in India. *Eur J Clin Microbiol Infect Dis.* 1992;11(11):990-3.
158. Tiwari DK, Golia S, Sangeetha KT, Vasudha CL. A study on the bacteriological profile and antibiogram of bacteremia in children below 10 years in a tertiary care hospital in Bangalore, India. *J Clin Diagn Res.* 2013;7(12):2732-5.
159. Tiwari P, Kaur S. Profile and sensitivity pattern of bacteria isolated from various cultures in a Tertiary Care Hospital in Delhi. *Indian J Public Health.* 2010;54(4):213-5.
160. Tjoa E, Moehario LH, Rukmana A, Rohsiswatmo R. *Acinetobacter baumannii*: role in blood stream infection in Neonatal Unit, Dr Cipto Mangunkusumo Hospital, Jakarta, Indonesia. *Int J Microbiol.* 2013;2013:180763.
161. Treebupachatsakul P, Srifeungfung S, Chayakulkeeree M. Brain abscess due to *Listeria monocytogenes*: first case report in Thailand. *J Med Assoc Thai.* 2006;89(9):1516-20.
162. Tsering DC, Chanchal L, Pal R, Kar S. Bacteriological profile of septicemia and the risk factors in neonates and infants in Sikkim. *J Glob Infect Dis.* 2011;3(1):42-5.
163. Turner P, Willemse C, Phakaudom K, Zin TW, Nosten F, McGready R. *Aeromonas* spp. bacteremia in pregnant women, Thailand-Myanmar border, 2011. *Emerg Infect Dis.* 2012;18(9):1522-3.
164. Valsalan R, Seshadri S, Pandit VR. Melioidosis masquerading as enteric fever. *Trans R Soc Trop Med Hyg.* 2008;102 Suppl 1:S117-8.
165. Vijayan AP, Anand MR, Remesh P. *Chromobacterium violaceum* Sepsis in an Infant. *Indian Pediatr.* 2009;46:721-2.
166. Visudhiphan P, Chiemchanya S, Visutibhan A. *Salmonella* meningitis in Thai infants: clinical case reports. *Trans R Soc Trop Med Hyg.* 1998;92(2):181-4.
167. Viswanathan R, Singh AK, Ghosh C, Dasgupta S, Mukherjee S, Basu S. Profile of neonatal septicaemia at a district-level sick newborn care unit. *J Health Popul Nutr.* 2012;30(1):41-8.
168. Viswanathan R, Singh AK, Basu S, Chatterjee S, Sardar S, Isaacs D. Multi-drug resistant gram negative bacilli causing early neonatal sepsis in India. *Arch Dis Child Fetal Neonatal Ed.* 2012;97(3):F182-7.
169. Viswanathan R, Singh AK, Basu S, Chatterjee S, Roy S, Isaacs D. Multi-drug-resistant, non-fermenting, gram-negative bacilli in neonatal sepsis in Kolkata, India: a 4-year study. *Paediatr Int Child Health.* 2014;34(1):56-9.
170. Waheed M, Laeeq A, Maqbool S. The etiology of neonatal sepsis and patterns of antibiotic resistance. *J Coll Physicians Surg Pak.* 2003;13(8):449-52.
171. Wain J, Pham VB, Ha V, Nguyen NM, To SD, Walsh AL, et al. Quantitation of bacteria in bone marrow from patients with typhoid fever: relationship between counts and clinical features. *J Clin Microbiol.* 2001;39(4):1571-6.
172. Walia M, Gaiind R, Mehta R, Paul P, Aggarwal P, Kalaivani M. Current perspectives of enteric fever: a hospital-based study from India. *Ann Trop Paediatr.* 2005;25(3):161-74.
173. Williams EJ, Thorson S, Maskey M, Mahat S, Hamaluba M, Dongol S, et al. Hospital-based surveillance of invasive pneumococcal disease among young children in urban Nepal. *Clin Infect Dis.* 2009;48 Suppl 2:S114-22.
174. Win MM, Nyein MM, Htwe MM, Mya T, Shwe TT, Han AM, et al. Pneumococcal infection in children attending Yangon Children's Hospital. *Myanmar Health Sci Res J.* 2014;26:1-5.

175. Zakariya BP, Bhat V, Harish BN, Arun Babu T, Joseph NM. Neonatal sepsis in a tertiary care hospital in South India: bacteriological profile and antibiotic sensitivity pattern. *Indian J Pediatr.* 2011;78(4):413-7.
176. Htun ZT, Win MM, Hla T, Myat TW, Lin N, Wah TT. Detection of *Burkholderia pseudomallei* in patients with suppurative infections attending the Yangon General Hospital and New Yangon General Hospital. *Myanmar Health Sci Res J.* 2013;25:114-20.
177. Zubair M, Zafar A, Ejaz H, Hafeez S, Javaid H, Javed A. Incidence of coagulase negative staphylococci in neonatal sepsis. *Pak J Med Health Sci.* 2011;5:716-9.
